# Supplementary material
Source: publisher site journal article supplement (https://www.dovepress.com/article/594405)
Supplement: Supplementary file 1 [file 594405%20Supplementary%20Material.doc]

Additional table S1. Relative abundance of phylum (%) in fecal samples collected in control group and COPD group.

| Phylum (%) | Control group (*n*=7) | COPD group (*n*=8) | *p* value |
| --- | --- | --- | --- |
| Firmicutes | 72.73 (56.17, 80.48) | 44.62 (37.35, 69.81) | **0.04** |
| Bacteroidetes | 23.48 (11.99, 31.26) | 23.20 (13.81, 35.65) | 0.69 |
| Proteobacteria | 2.605 (0.76, 7.62) | 16.20 (3.10, 43.87) | 0.054 |
| Actinobacteria | 1.53 (1.49, 2.61) | 2.03 (1.02, 4.56) | 0.99 |
| Fusobacteria | 0.01 (0.01, 1.81) | 0.01 (0.00, 0.50) | 0.38 |
| Others | 0.02 (0.01, 0.05) | 0.03 (0.01, 0.34) | 0.80 |

Data are presented as medians (interquartile range). Differences were evaluated using Mann-Whitney test. Bold font indicates *p* < 0.05.

Additional table S2. Relative abundance of genus (%) in fecal samples collected in control group and COPD group.

| Genus (%) | Control group (*n*=7) | COPD group (*n*=8) | *p* value |
| --- | --- | --- | --- |
| *Bacteroides* | 13.91 (4.69, 22.76) | 15.23 (3.79, 27.7) | 0.69 |
| *Faecalibacterium* | 17.35 (13.93, 23.80) | 0.86 (0.07, 6.42) | **0.006** |
| *Escherichia-Shigella* | 0.03 (0.01, 0.42) | 6.18 (1.55, 43.04) | **0.009** |
| *Subdoligranulum* | 9.11 (4.27, 15.82) | 0.58 (0.04, 10.85) | 0.07 |
| *Blautia* | 2.37 (1.06, 4.05) | 4.50 (0.77, 7.21) | 0.40 |
| *Bifidobacterium* | 0.87 (0.06, 2.30) | 1.25 (0.22, 4.29) | 0.81 |
| *Prevotella_9* | 0.52 (0.12, 2.25) | 0.00 (0.00, 0.24) | 0.07 |
| *Roseburia* | 2.71 (0.68, 11.48) | 0.16 (0.01, 1.08) | **0.03** |
| *Lachnospiraceae_Unclassified* | 1.87 (1.44, 3.56) | 1.64 (0.61, 3.66) | 0.54 |
| *Ruminococcus_gnavus* | 0.00 (0.00, 0.06) | 2.51 (0.39, 4.82) | **0.008** |
| *Agathobacter* | 4.81 (0.94, 7.96) | 0.09 (0.01, 0.55) | **0.01** |
| *Ruminococcaceae_UCG-014* | 0.07 (0.00, 1.45) | 0.01 (0.00, 0.07) | 0.57 |
| *Klebsiella* | 0.19 (0.02, 1.39) | 0.03 (0.00, 0.25) | 0.29 |
| *Dialister* | 3.19 (0.12, 4.17) | 0.21 (0.01, 1.34) | 0.12 |
| *Lachnoclostridium* | 1.3 (0.63, 2.17) | 1.12 (0.44, 5.00) | 0.96 |
| *Alistipes* | 0.59 (0.15, 2.85) | 0.41 (0.01, 3.66) | 0.78 |
| *Parabacteroides* | 0.60 (0.24, 0.66) | 0.75 (0.02, 1.55) | 0.63 |
| *Ruminococcus_torques* | 1.06 (0.26, 2.54) | 0.61 (0.22, 2.25) | 0.78 |

Data are presented as medians (interquartile range). Differences were evaluated using Mann-Whitney test. Bold font indicates *p* < 0.05.

Additional table S3. Relative abundance of phylum (%) in fecal samples collected in mice.

| Phylum (%) | Control group (*n*=6) | COPD group (*n*=6) | *p* value |
| --- | --- | --- | --- |
| Firmicutes | 72.15 (62.10, 79.83) | 51.23 (45.60, 60.64) | **0.009** |
| Bacteroidetes | 13.75 (9.98, 15.37) | 31.45 (15.75, 41.01) | 0.06 |
| Proteobacteria | 5.41 (3.70, 9.71) | 11.51 (6.50, 13.35) | 0.24 |
| Verrucomicrobia | 0.14 (0.05, 0.80) | 0.11 (0.03, 9.87) | 0.99 |
| Epsilonbacteraeota | 1.13 (0.02, 4.68) | 0.66 (0.12, 4.88) | 0.70 |
| Others | 5.78 (4.47, 8.12) | 0.73 (0.34, 2.71) | 0.002 |

Data are presented as medians (interquartile range). Differences were evaluated using Mann-Whitney test. Bold font indicates *p* < 0.05.

Additional table S4. Relative abundance of genus (%) in fecal samples collected in mice.

| Genus (%) | Control group (*n*=6) | COPD group (*n*=6) | *p* value |
| --- | --- | --- | --- |
| *Lactobacillus* | 37.27 (28.84, 62.45) | 14.64 (7.48, 24.11) | **0.002** |
| *Muribaculaceae_Unclassified* | 11.35 (9.31, 13.23) | 29.47 (15.41, 39.00) | 0.064 |
| *Lachnospiraceae_Unclassified* | 10.74 (7.71, 15.50) | 7.79 (4.56, 12.21) | 0.24 |
| *Lachnospiraceae_NK4A136* | 7.58 (2.71, 15.14) | 4.80 (2.20, 8.15) | 0.48 |
| *Desulfovibrio* | 5.12 (3.27, 9.29) | 9.24 (0.02, 10.90) | 0.82 |
| *Lachnoclostridium* | 0.43 (0.16, 0.73) | 0.45 (0.20, 7.90) | 0.94 |
| *Akkermansia* | 0.14 (0.05, 0.80) | 0.00 (0.03, 9.87) | 0.99 |
| *Helicobacter* | 1.13 (0.02, 4.68) | 0.66 (0.12, 4.88) | 0.70 |
| *Blautia* | 0.10 (0.05, 0.17) | 3.66 (1.60, 5.27) | **0.002** |
| *Candidatus_*Saccharimonas | 3.42 (1.97, 5.24) | 0.10 (0.01, 0.22) | **0.002** |
| *Ruminococcaceae_UCG-014* | 0.65 (0.55, 2.54) | 1.13 (0.22, 5.12) | 0.82 |
| *Klebsiella* | 0.00 (0.00, 0.07) | 0.03 (0.01, 3.40) | 0.10 |
| *Enterorhabdus* | 1.09 (0.96, 1.41) | 0.58 (0.12, 1.95) | 0.39 |
| *Ruminococcaceae_Unclassified* | 0.57 (0.24, 0.93) | 0.81 (0.42, 2.04) | 0.48 |
| *Ruminococcaceae_UCG-013* | 0.34 (0.14, 1.25) | 0.46 (0.11, 2.18) | 0.85 |
| *Others* | 9.78 (7.57, 11.13) | 11.04 (9.52, 18.41) | 0.13 |

Data are presented as medians (interquartile range). Differences were evaluated using Mann-Whitney test. Bold font indicates *p* < 0.05.
